# Supplementary material for: A Fully Human Monoclonal Antibody Targeting cKIT Is a Potent Inhibitor of Pathological Choroidal Neovascularization in Mice
Source: MDPI journal article supplement (doi:10.3390/pharmaceutics13081308), 2021-08-20
Supplement: s1 [file s1]

# Supplementary Materials: A Fully Human Monoclonal Antibody Targeting cKIT Is a Potent Inhibitor of Pathological Choroidal Neovascularization in Mice

Songyi Seo, Koung Li Kim, Yeongju Yeo, Ryul-I Kim, Hayoung Jeong, Jin-Ock Kim, Sun-Hwa Song, Mi-Jin An, Jung-Woong Kim, Hye Kyoung Hong, Min Hee Ham, Se Joon Woo, Jong-Hyuk Sung, Sang Gyu Park and Wonhee Suh

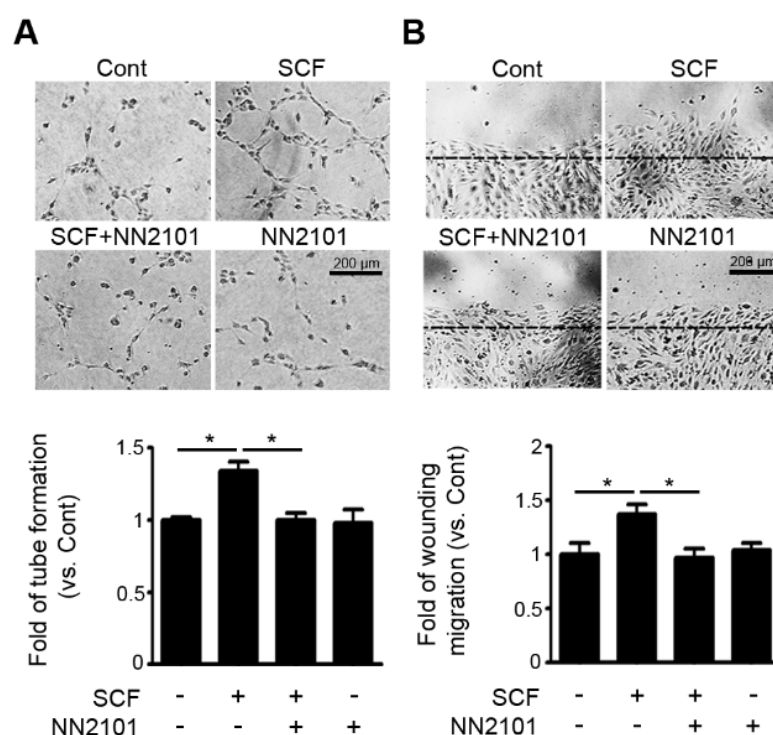

**Figure S1.** NN2101 effectively inhibits SCF-mediated *in vitro* angiogenesis in murine endothelial cells at hypoxia. (A) Tube formation and (B) scratch wounding migration assays were performed using murine endothelial cells subjected to treatment with or without recombinant mouse SCF (50 ng/mL) and NN2101 (1  $\mu$ g/mL) at hypoxia. Tube formation and scratch wound migration results were quantified by measuring the tube length and relative area covered by cells that had migrated from the wound edges, respectively. The data are expressed as the fold increase  $\pm$  SEM compared to the untreated control group (one-way ANOVA with Bonferroni *post hoc* multiple comparison test, \* $p < 0.05$ ,  $n > 2$ ).

**Table S1.** IgGs used for western blotting and immunohistochemistry.

| <b>IgG</b>                              | <b>Supplier</b>                              | <b>Catalog Number</b> | <b>Dilution Ratio</b> |
|-----------------------------------------|----------------------------------------------|-----------------------|-----------------------|
| p-cKIT (Tyr719)                         | Cell Signaling Technology<br>(Danvers, MA)   | 3391                  | 1:1000                |
| cKIT (human)                            | R&D Systems<br>(Minneapolis, MN)             | AF332                 | 1:1000                |
| cKIT (Mouse)                            | R&D Systems                                  | MAB1356               | 1:1000                |
| p-AKT (ser473)                          | Cell Signaling Technology                    | 9271                  | 1:1000                |
| AKT                                     | Cell Signaling Technology                    | 9272                  | 1:1000                |
| p-GSK-3 $\beta$ (Ser9)                  | Cell Signaling Technology                    | 9323                  | 1:1000                |
| GSK-3 $\beta$                           | Cell Signaling Technology                    | 9315                  | 1:1000                |
| p- $\beta$ -catenin<br>(Ser33/37/Thr41) | Cell Signaling Technology                    | 9561                  | 1:1000                |
| $\beta$ -catenin                        | BD Biosciences<br>(San Diego, CA)            | 610153                | 1:1000                |
| PARP                                    | Santa Cruz Biotechnology<br>(Santa Cruz, CA) | SC8007                | 1:1000                |
| $\beta$ -actin (human)                  | Sigma-Aldrich<br>(St. Louis, MO)             | A2066                 | 1:2500                |
| $\beta$ -actin (mouse)                  | Santa Cruz Biotechnology                     | SC-47778              | 1:2500                |
| VEGFA (human)                           | Abcam<br>(Cambridge, UK)                     | AB4615                | 1:1000                |
| VEGFA (mouse)                           | Santa Cruz Biotechnology                     | SC-152                | 1:1000                |
| IL-8 (human)                            | Abcam                                        | AB235584              | 1:1000                |
| IL-8 (mouse)                            | Abcam                                        | AB183705              | 1:1000                |
| c-Myc                                   | Cell Signaling Technology                    | 13987                 | 1:1000                |
| CyclinD1                                | Cell Signaling Technology                    | 2976                  | 1:1000                |
| Peroxidase-labeled anti-goat IgG        | VECTOR<br>(Burlingame, CA)                   | PI-9500               | 1:2000                |
| Peroxidase-labeled anti-mouse IgG       | VECTOR                                       | PI-2000               | 1:2000                |
| Peroxidase-labeled anti-rabbit IgG      | VECTOR                                       | PI-1000               | 1:2000                |
| GFAP                                    | Dako<br>(Carpinteria, CA)                    | Z0334                 | 1:1000                |
